# Supplementary material for: Improvement in Infection Prevention and Control Performance Following Operational Research in Sierra Leone: A Before (2021) and After (2023) Study
Source: MDPI journal article supplement (doi:10.3390/tropicalmed8070376), 2023-07-23
Supplement: s1 [file s1]

**Supplementary Table S1:** Median percentage scores of the core components of IPCAF in twelve district secondary hospitals of Sierra Leone during 20121 and 2023

| District<br>Secondary<br>Hospitals | Year | i. IPC<br>programme | ii. IPC<br>guidelines | iii. IPC<br>education<br>&<br>training | iv. HAI<br>surveillance | v. Multimodal<br>strategies | vi. Monitoring/<br>audit and<br>feedback | vii. Workload,<br>staffing, bed<br>occupancy | viii. Built<br>environment,<br>materials and<br>equipment | *Cumulative<br>score | #Cumulative<br>median score<br>(%) |
|------------------------------------|------|---------------------|-----------------------|----------------------------------------|-------------------------|-----------------------------|------------------------------------------|----------------------------------------------|-----------------------------------------------------------|----------------------|------------------------------------|
| DSH1                               | 2021 | 50                  | 68                    | 85                                     | 43                      | 45                          | 63                                       | 30                                           | 61                                                        | 444                  | 55                                 |
|                                    | 2023 | 58                  | 78                    | 40                                     | 48                      | 40                          | 65                                       | 35                                           | 51                                                        | 414                  | 52                                 |
| DSH2                               | 2021 | 50                  | 75                    | 85                                     | 43                      | 45                          | 50                                       | 35                                           | 63                                                        | 445                  | 56                                 |
|                                    | 2023 | 48                  | 70                    | 70                                     | 45                      | 35                          | 60                                       | 45                                           | 46                                                        | 419                  | 52                                 |
| DSH3                               | 2021 | 45                  | 75                    | 75                                     | 28                      | 45                          | 48                                       | 30                                           | 49                                                        | 394                  | 49                                 |
|                                    | 2023 | 73                  | 78                    | 70                                     | 40                      | 40                          | 48                                       | 50                                           | 51                                                        | 449                  | 56                                 |
| DSH4                               | 2021 | 48                  | 68                    | 80                                     | 45                      | 45                          | 65                                       | 25                                           | 54                                                        | 429                  | 54                                 |
|                                    | 2023 | 68                  | 80                    | 80                                     | 40                      | 55                          | 55                                       | 45                                           | 46                                                        | 469                  | 59                                 |
| DSH5                               | 2021 | 35                  | 68                    | 60                                     | 45                      | 45                          | 58                                       | 40                                           | 50                                                        | 400                  | 50                                 |
|                                    | 2023 | 63                  | 80                    | 85                                     | 50                      | 55                          | 70                                       | 45                                           | 76                                                        | 524                  | 65                                 |
| DSH6                               | 2021 | 30                  | 68                    | 65                                     | 45                      | 45                          | 53                                       | 25                                           | 51                                                        | 381                  | 48                                 |
|                                    | 2023 | 50                  | 80                    | 75                                     | 50                      | 60                          | 58                                       | 50                                           | 83                                                        | 505                  | 63                                 |
| DSH7                               | 2021 | 28                  | 68                    | 80                                     | 45                      | 45                          | 58                                       | 25                                           | 49                                                        | 396                  | 50                                 |
|                                    | 2023 | 78                  | 88                    | 80                                     | 50                      | 35                          | 48                                       | 45                                           | 55                                                        | 478                  | 60                                 |
| DSH8                               | 2021 | 48                  | 68                    | 80                                     | 50                      | 45                          | 50                                       | 25                                           | 55                                                        | 420                  | 53                                 |
|                                    | 2023 | 58                  | 70                    | 50                                     | 48                      | 25                          | 48                                       | 35                                           | 58                                                        | 390                  | 49                                 |
| DSH9                               | 2021 | 50                  | 75                    | 80                                     | 5                       | 45                          | 58                                       | 30                                           | 51                                                        | 394                  | 49                                 |
|                                    | 2023 | 73                  | 78                    | 85                                     | 63                      | 70                          | 75                                       | 40                                           | 75                                                        | 558                  | 70                                 |
| DSH10                              | 2021 | 28                  | 68                    | 65                                     | 45                      | 45                          | 48                                       | 45                                           | 55                                                        | 398                  | 50                                 |
|                                    | 2023 | 75                  | 80                    | 85                                     | 48                      | 50                          | 63                                       | 45                                           | 69                                                        | 514                  | 64                                 |
| DSH11                              | 2021 | 40                  | 68                    | 80                                     | 50                      | 45                          | 53                                       | 25                                           | 50                                                        | 410                  | 51                                 |
|                                    | 2023 | 58                  | 80                    | 75                                     | 45                      | 35                          | 38                                       | 35                                           | 61                                                        | 426                  | 53                                 |
| DSH12                              | 2021 | 25                  | 65                    | 70                                     | 10                      | 45                          | 30                                       | 30                                           | 51                                                        | 326                  | 41                                 |
|                                    | 2023 | 68                  | 73                    | 80                                     | 43                      | 75                          | 58                                       | 35                                           | 59                                                        | 489                  | 61                                 |

*Abbreviation:* DSH= District hospital, IPC= Infection, Prevention and Control; HAI= Healthcare Associated Infection. \* Maximum score for each component is 100 and for the cumulative it is 800, # Percentages are calculated relative to the maximum score for the component. Grade: IPC performance in each component will be graded based on the obtained percentage: i) inadequate (0%-25%) ii) basic (25.1%-50%) iii) intermediate (50.1%-75%) and iv) advanced (75.1%-100%)
